# Supplementary material for: Rethinking the stability of metal nanoclusters: the individual versus the collective
Source: Royal Society of Chemistry journal article supplement (doi:10.1039/d4nr01748j), 2024-01-01
Supplement: d4nr01748j1.pdf [file d4nr01748j1.pdf]

## ***Supporting Information***

### **Rethinking the Stability of Metal Nanoclusters: the Individual *versus* the Collective**

Di Zhang,<sup>‡</sup> Peiyao Pan,<sup>‡</sup> Xiaoqin Du, Xi Kang,<sup>\*</sup> Manzhou Zhu<sup>\*</sup>

Department of Chemistry and Centre for Atomic Engineering of Advanced Materials, Anhui Province Key Laboratory of Chemistry for Inorganic/Organic Hybrid Functionalized Materials, Key Laboratory of Structure and Functional Regulation of Hybrid Materials, Anhui University, Ministry of Education, Anhui University, Hefei, Anhui 230601, P. R. China.

<sup>‡</sup>D.Z. and P.P. contributed equally to this work.

<sup>\*</sup>E-mails of corresponding authors: kangxi\_chem@ahu.edu.cn (X.K.); z mz@ahu.edu.cn (M.Z.)

*This Supporting Information includes:*

Experimental Methods

Scheme S1

Figures S1-S9

Tables S1-S2

## Experimental Details

### Chemicals

Tetrachloroauric(III) acid ( $\text{HAuCl}_4 \cdot 3\text{H}_2\text{O}$ , 99.99%, metals basis), tetraoctylammonium bromide (TOAB, 98%, ), Copper(II) acetylacetonate ( $\text{Cu}(\text{C}_5\text{H}_7\text{O}_2)_2$ , 99.99%, metals basis), sodium borohydride ( $\text{NaBH}_4$ , 99.99%), triphenylphosphine ( $\text{C}_{18}\text{H}_{15}\text{P}$ , 97%), 1-adamantanethiol ( $\text{C}_{10}\text{H}_{15}\text{SH}$ , 99%), toluene ( $\text{Ph-CH}_3$ , HPLC grade), methanol ( $\text{CH}_3\text{OH}$ , HPLC grade), methylene chloride ( $\text{CH}_2\text{Cl}_2$ , HPLC grade), *n*-hexane ( $\text{C}_6\text{H}_{14}$ , HPLC grade).

### Synthesis of $\text{Au}_2\text{Cu}_6(\text{S-Adm})_6(\text{PPh}_3)_2$ nanocluster ( $\text{Au}_2\text{Cu}_6$ -Triclinic)

$\text{Au}_2\text{Cu}_6(\text{S-Adm})_6(\text{PPh}_3)_2$  was synthesized as reported previously (Angew. Chem. Int. Ed. 2016, 55, 3611). Briefly,  $\text{HAuCl}_4 \cdot 3\text{H}_2\text{O}$  (0.1576 g, 0.4 mmol) and TOAB (0.2 g, 0.37 mmol) were dissolved in 15 mL of toluene and vigorously stirred for 15 minutes. Then,  $\text{PPh}_3$  (0.3 g, 1.14 mmol; dissolved in 10 mL  $\text{CH}_3\text{OH}$ ) was added. After 30 minutes,  $\text{Cu}(\text{C}_5\text{H}_7\text{O}_2)_2$  (0.06 g, 0.23 mmol) was dissolved in 20 mL  $\text{CH}_3\text{OH}$  and added quickly. Then, Adm-SH (0.13g, 0.80 mmol; dissolved in 1 mL of toluene) and  $\text{NaBH}_4$  (80mg, 2.1 mmol; dissolved in 1 mL of ice-cold water) were added simultaneously. The reaction was proceeded for 60 hours. The resulting solution was centrifuged to obtain the precipitate, which was washed several times with *n*-hexane. The precipitate was dissolved in the  $\text{CH}_2\text{Cl}_2$  and toluene with *v:v* of 2:1, and underwent the crystallization with a liquid diffusion approach by diffusing the *n*-hexane (as depicted in Scheme S1). After three days, red crystals were obtained, and the crystal structure of the  $\text{Au}_2\text{Cu}_6$ -Triclinic nanocluster was determined.

### Synthesis of $\text{Au}_2\text{Cu}_6(\text{S-Adm})_6(\text{PPh}_3)_2$ nanocluster ( $\text{Au}_2\text{Cu}_6$ -Trigonal)

For the crystallization system of  $\text{Au}_2\text{Cu}_6$ -Triclinic, after another seven days, the red crystals gradually disappeared, and meanwhile, several small-sized black and rhombic crystals appeared at the bottom of the single-crystal culture plate, proven to be the  $\text{Au}_2\text{Cu}_6$  with a trigonal crystalline system (i.e.,  $\text{Au}_2\text{Cu}_6$ -Trigonal).

### Characterizations

The optical absorption (UV-vis) spectra of nanoclusters were recorded using an Agilent 8453 diode array spectrometer.

Photoluminescence spectra were measured on a FLUOROLOG-3-TAU spectrometer.

### X-Ray Crystallography

The data collection for single-crystal X-ray diffraction (SC-XRD) of all nanocluster crystal samples was carried out on Stoe Stadivari diffractometer under nitrogen flow, using graphite-monochromatized Cu  $\text{K}\alpha$  radiation ( $\lambda = 1.54186 \text{ \AA}$ ). Data reductions and absorption corrections were performed using the SAINT and SADABS programs, respectively. The structure was solved by direct methods and refined with full-matrix least squares on  $F^2$  using the SHELXTL software package. All non-hydrogen atoms were refined anisotropically, and all the hydrogen atoms were set in geometrically calculated positions and refined isotropically using a riding model. All crystal structures were treated with PLATON SQUEEZE. The CCDC number of the  $\text{Au}_2\text{Cu}_6$ -Triclinic nanocluster is 2347499. The CCDC number of  $\text{Au}_2\text{Cu}_6$ -Trigonal nanocluster is 2347507.

**Scheme S1.** The preparation, crystallization, and transformation of Au<sub>2</sub>Cu<sub>6</sub> nanoclusters.

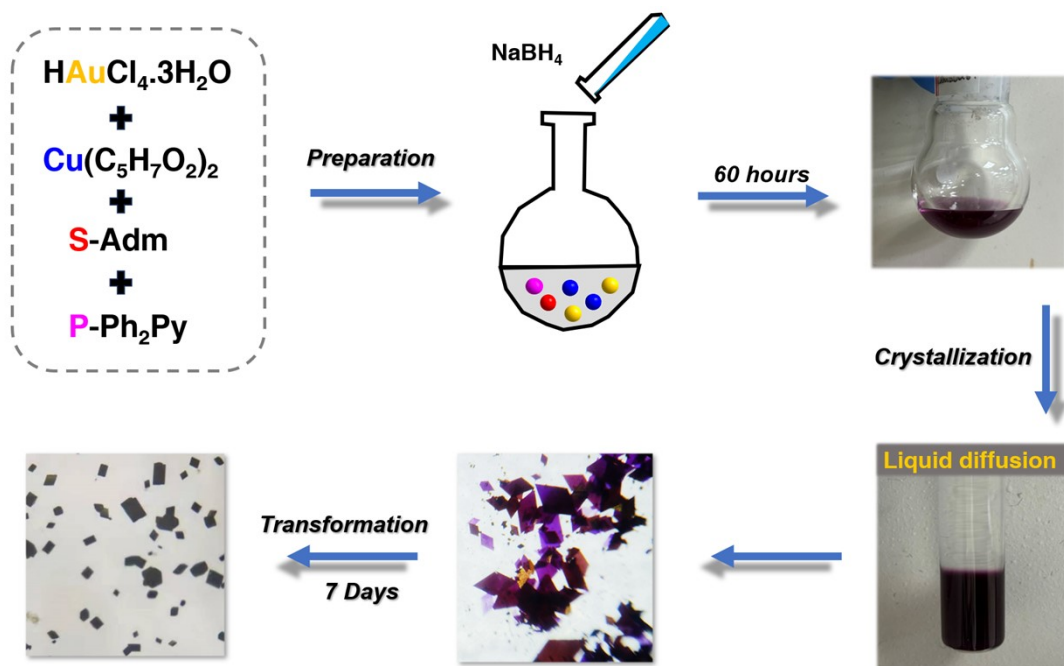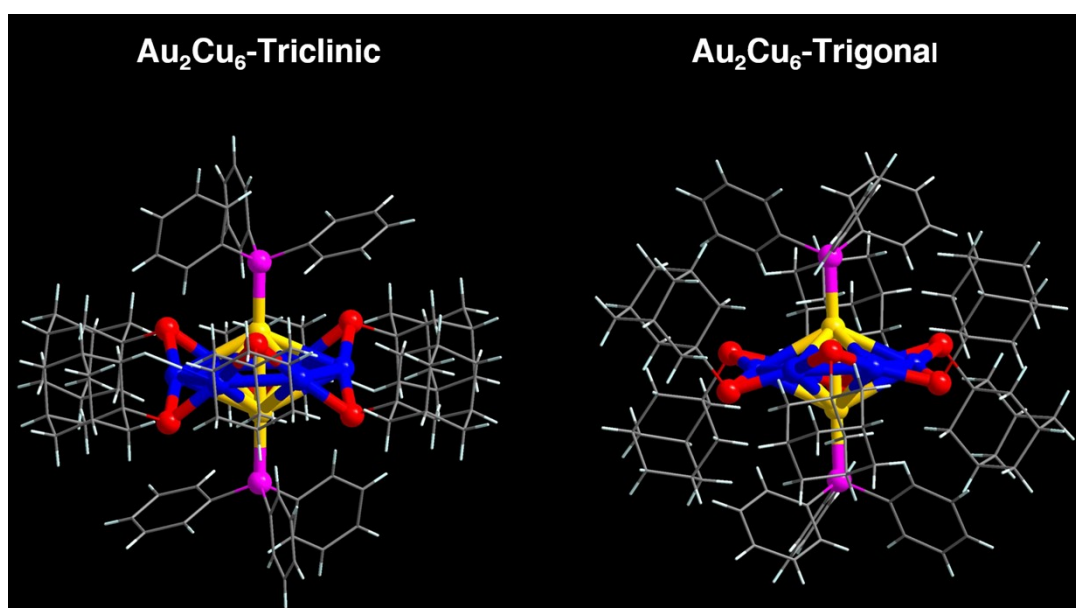

**Figure S1.** Overall structures of Au<sub>2</sub>Cu<sub>6</sub>-Triclinic and Au<sub>2</sub>Cu<sub>6</sub>-Trigonal nanoclusters. Color labels: orange = Au; blue = Cu; red = S; magenta = P; grey = C; white = H.

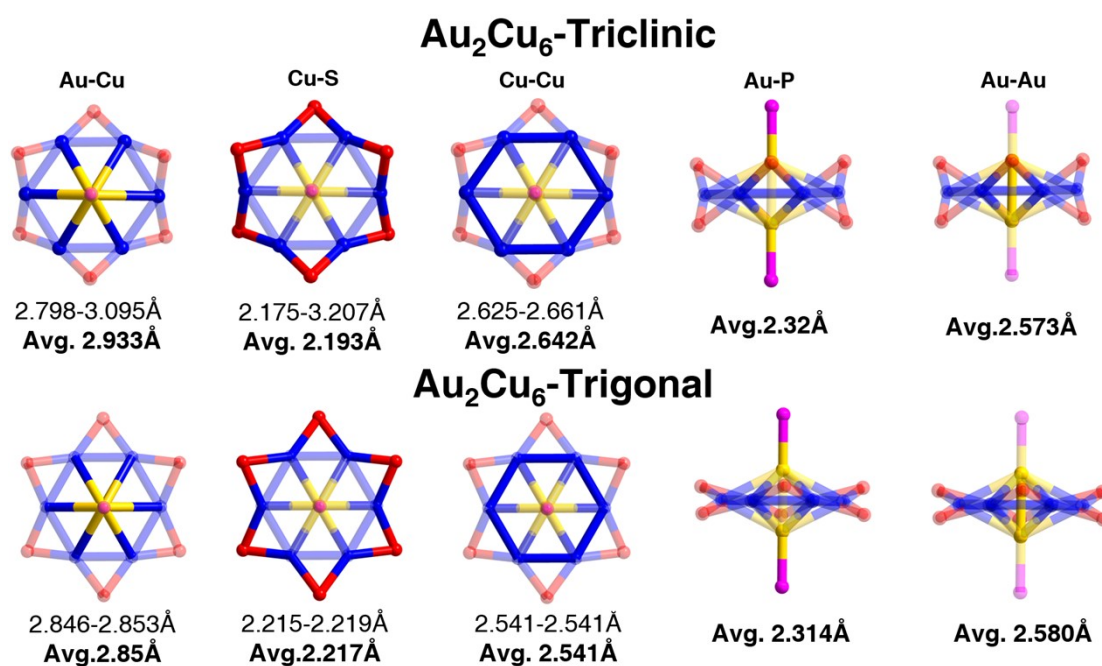

**Figure S2.** Comparison of the corresponding bond lengths of Au<sub>2</sub>Cu<sub>6</sub>-Triclinic and Au<sub>2</sub>Cu<sub>6</sub>-Trigonal nanoclusters, including Au-Cu, Cu-S, Cu-Cu, Au-P, and Au-Au bonds.

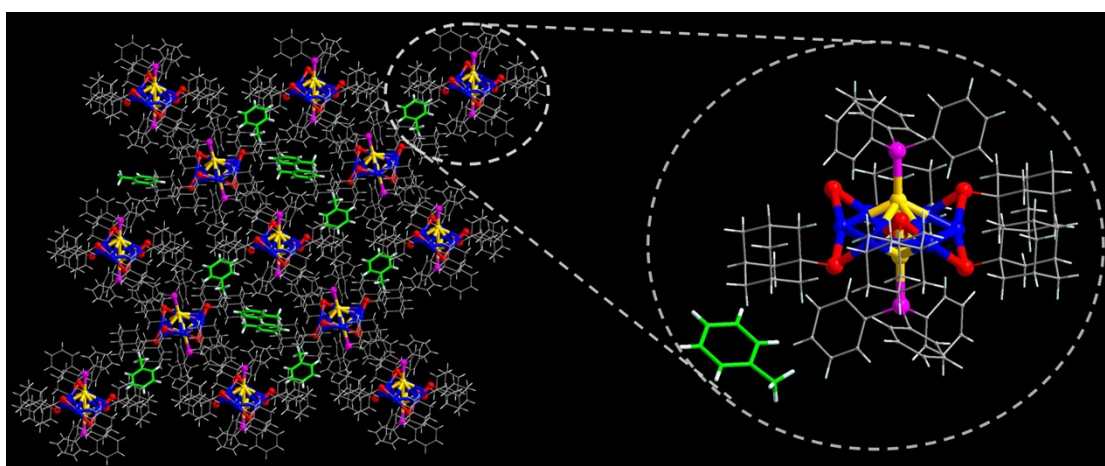

**Figure S3.** A unique toluene molecule was observed in the crystalline lattice of Au<sub>2</sub>Cu<sub>6</sub>-Triclinic, and the mole ratio of Au<sub>2</sub>Cu<sub>6</sub>-Triclinic cluster molecule/toluene molecule in the crystalline lattice is 1:1. Color labels: orange = Au; blue = Cu; red = S; magenta = P; grey = C in cluster molecules; green = C in toluene molecules; white = H.

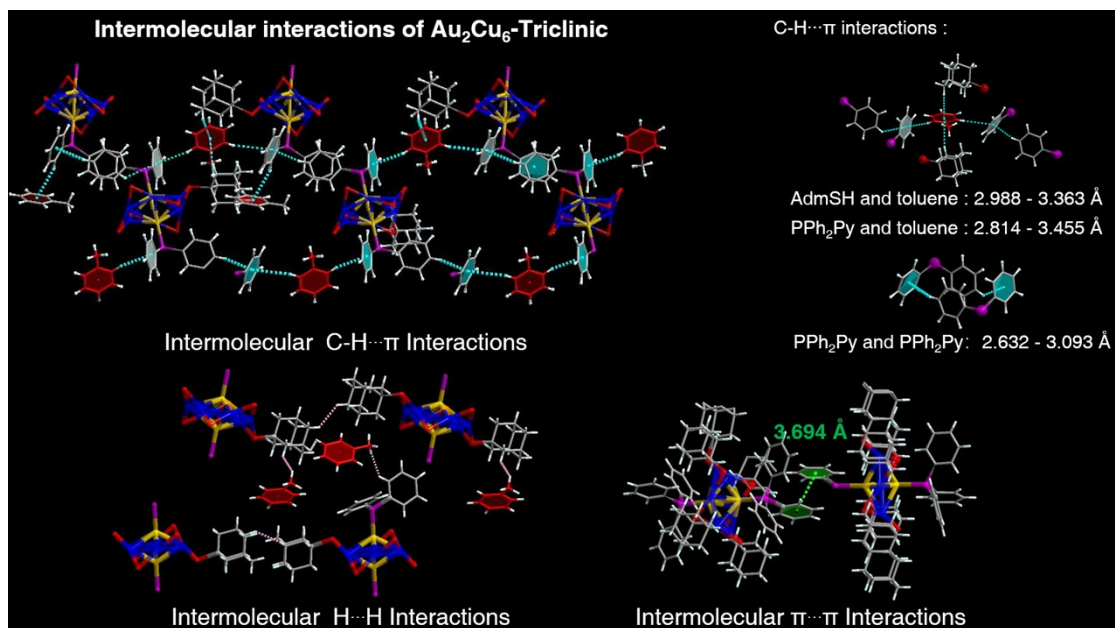

**Figure S4.** Due to the presence of the toluene molecule, several intermolecular C-H... $\pi$ , H...H, and  $\pi$ ... $\pi$  interactions were detected in the crystal lattice of Au<sub>2</sub>Cu<sub>6</sub>-Triclinic. Color labels: orange = Au; blue = Cu; red = S; magenta = P; grey = C in cluster molecules; dark red = C in toluene molecules; white = H.

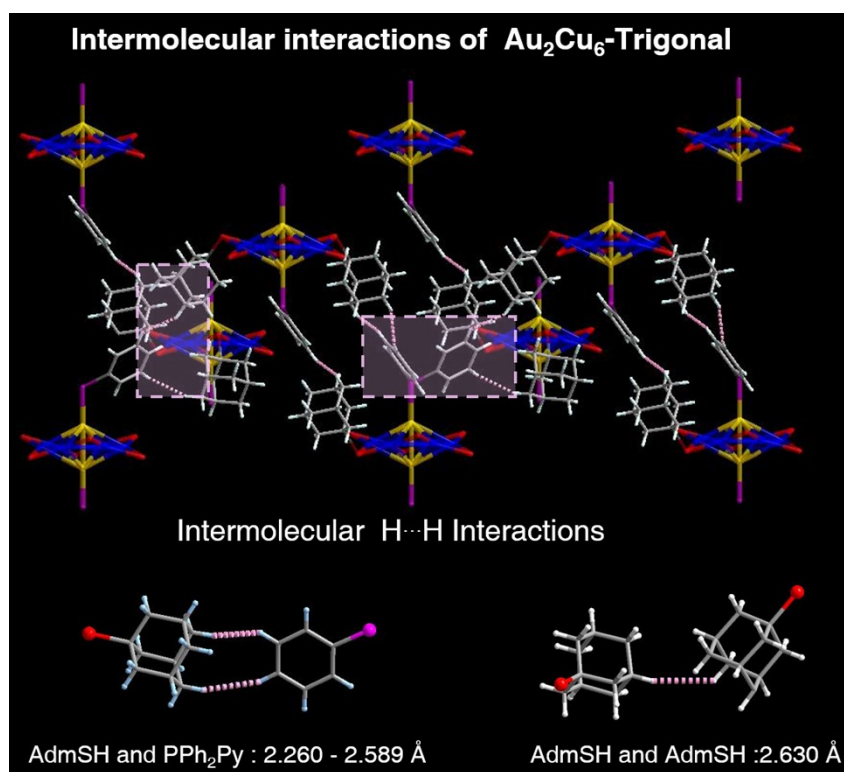

**Figure S5.** Weak H...H interactions in Au<sub>2</sub>Cu<sub>6</sub>-Trigonal. Color labels: orange = Au; blue = Cu; red = S; magenta = P; grey = C; white = H.

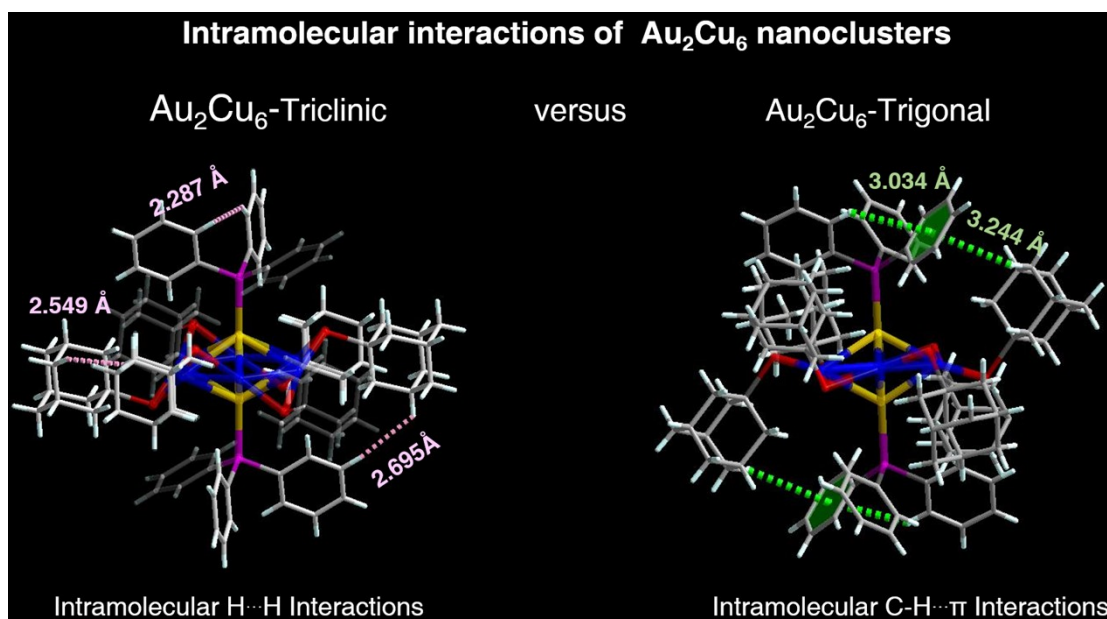

**Figure S6.** Intramolecular C-H... $\pi$  or H...H interactions in  $\text{Au}_2\text{Cu}_6$  nanoclusters. Color labels: orange = Au; blue = Cu; red = S; magenta = P; grey = C; white = H. Pink labels: intramolecular H...H interactions in  $\text{Au}_2\text{Cu}_6$ -Triclinic. Green labels: intramolecular C-H... $\pi$  interactions in  $\text{Au}_2\text{Cu}_6$ -Trigonal.

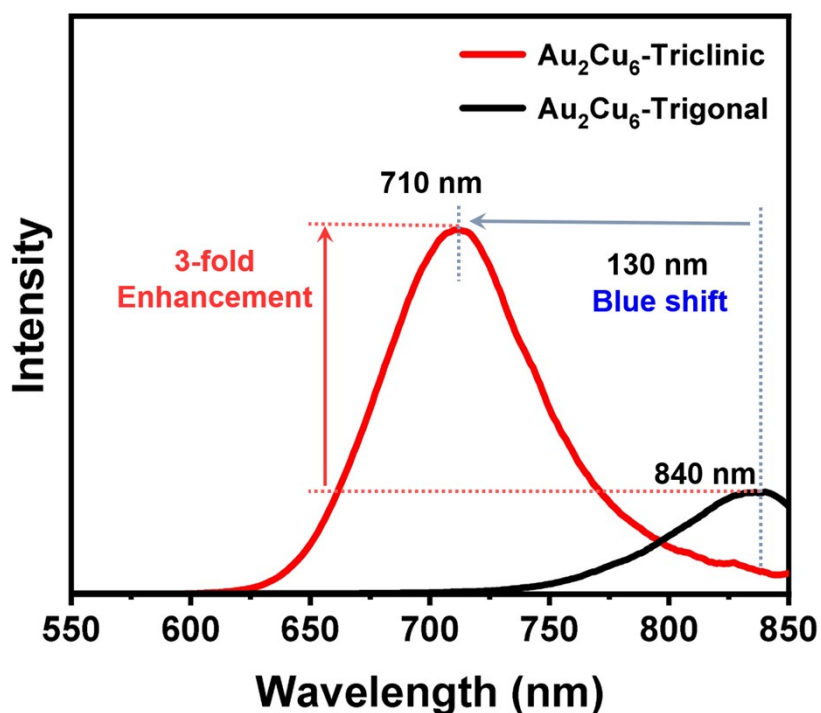

**Figure S7.** Comparison of the photoluminescence of the two  $\text{Au}_2\text{Cu}_6$  nanocluster crystals. Black line: photoluminescence spectrum of  $\text{Au}_2\text{Cu}_6$ -Trigonal. Red line: photoluminescence spectrum of  $\text{Au}_2\text{Cu}_6$ -Triclinic. A 130 nm blue-shift on emission wavelength and a 3-fold enhancement on photoluminescence intensity were observed by comparing the emission of  $\text{Au}_2\text{Cu}_6$ -Triclinic to  $\text{Au}_2\text{Cu}_6$ -Trigonal.

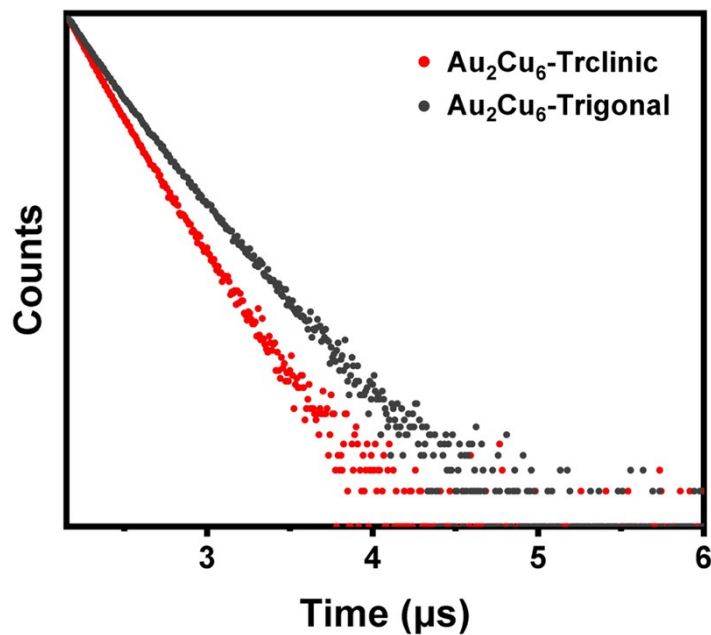

**Figure S8.** The PL lifetime of Au<sub>2</sub>Cu<sub>6</sub>-Triclinic (1.747 μs) was slightly shorter than that of Au<sub>2</sub>Cu<sub>6</sub>-Trigonal (2.209 μs). Black line: photoluminescence decay of Au<sub>2</sub>Cu<sub>6</sub>-Trigonal. Red line: photoluminescence decay of Au<sub>2</sub>Cu<sub>6</sub>-Triclinic.

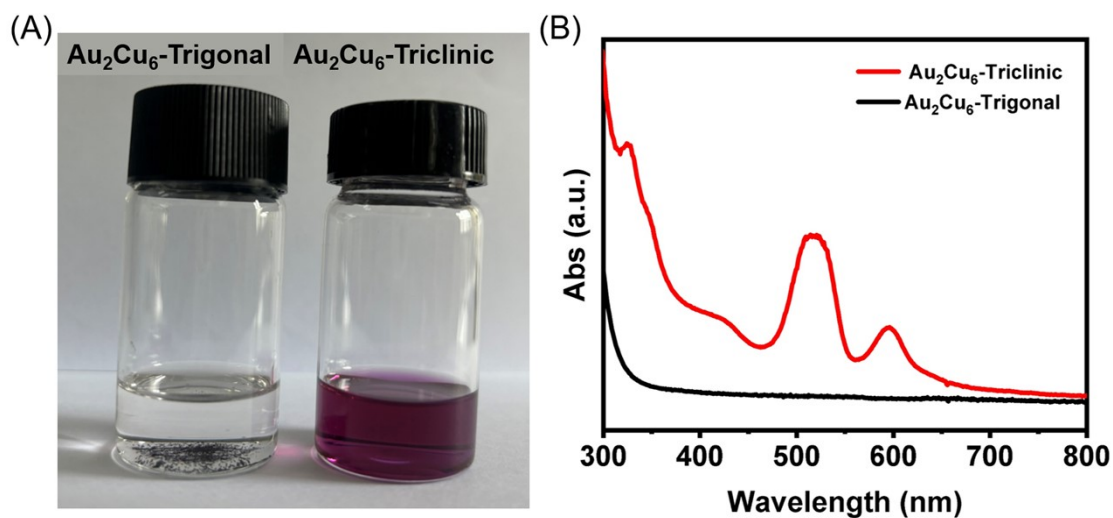

**Figure S9.** (A) The Au<sub>2</sub>Cu<sub>6</sub>-Triclinic crystals displayed good solubility in CH<sub>2</sub>Cl<sub>2</sub>, while the Au<sub>2</sub>Cu<sub>6</sub>-Trigonal was almost insoluble. Crystals of Au<sub>2</sub>Cu<sub>6</sub>-Triclinic also displayed good solubility in CHCl<sub>3</sub>, toluene, and tetrahydrofuran, and their optical absorptions were the same as that of CH<sub>2</sub>Cl<sub>2</sub>. By comparison, the Au<sub>2</sub>Cu<sub>6</sub>-Trigonal crystals were insoluble in such solutions. (B) The optical absorptions of the CH<sub>2</sub>Cl<sub>2</sub> solutions of the cluster crystals, which further suggested the good solubility of Au<sub>2</sub>Cu<sub>6</sub>-Triclinic and the insolubility of Au<sub>2</sub>Cu<sub>6</sub>-Trigonal.

**Table S1.** Crystal data and structure refinement for the Au<sub>2</sub>Cu<sub>6</sub>-Triclinic nanocluster. The CCDC number of the Au<sub>2</sub>Cu<sub>6</sub>-Triclinic nanocluster is 2347499.

|                                                                   |                                                                                                                |
|-------------------------------------------------------------------|----------------------------------------------------------------------------------------------------------------|
| Molecular formula                                                 | C <sub>110</sub> H <sub>136</sub> Au <sub>2</sub> Cu <sub>6</sub> N <sub>2</sub> P <sub>2</sub> S <sub>6</sub> |
| Crystal system                                                    | triclinic                                                                                                      |
| Space group                                                       | <i>P</i> -1                                                                                                    |
| <i>a</i> /Å                                                       | 15.244(10)                                                                                                     |
| <i>b</i> /Å                                                       | 18.456(12)                                                                                                     |
| <i>c</i> /Å                                                       | 18.809(7)                                                                                                      |
| $\alpha$ /°                                                       | 74.97(4)                                                                                                       |
| $\beta$ /°                                                        | 82.45(4)                                                                                                       |
| $\gamma$ /°                                                       | 88.26(5)                                                                                                       |
| Volume/Å <sup>3</sup>                                             | 5066(5)                                                                                                        |
| Z                                                                 | 2                                                                                                              |
| $\rho_{\text{calc}}$ /cm <sup>3</sup>                             | 1.631                                                                                                          |
| $\mu$ /mm <sup>-1</sup>                                           | 8.455                                                                                                          |
| F(000)                                                            | 2508.0                                                                                                         |
| Radiation                                                         | CuK $\alpha$ ( $\lambda$ = 1.54186)                                                                            |
| Index ranges                                                      | -17 $\leq$ <i>h</i> $\leq$ 12, -21 $\leq$ <i>k</i> $\leq$ 18, -21 $\leq$ <i>l</i> $\leq$ 21                    |
| 2 $\theta$ range (°)                                              | 9.926 to 124.998                                                                                               |
| Measured reflections and unique reflections                       | 33167 [ <i>R</i> <sub>int</sub> = 0.0493, <i>R</i> <sub>sigma</sub> = 0.0741]                                  |
| Goodness-of-fit on <i>F</i> <sup>2</sup>                          | 0.949                                                                                                          |
| Largest diff. peak/hole / e Å <sup>-3</sup>                       | 2.71/-1.53                                                                                                     |
| Final <i>R</i> indexes [ <i>I</i> $\geq$ 2 $\sigma$ ( <i>I</i> )] | <i>R</i> <sub>1</sub> = 0.0483, <i>wR</i> <sub>2</sub> = 0.1164                                                |
| Final <i>R</i> indexes [all data]                                 | <i>R</i> <sub>1</sub> = 0.0658, <i>wR</i> <sub>2</sub> = 0.1219                                                |



**Table S2.** Crystal data and structure refinement for the Au<sub>2</sub>Cu<sub>6</sub>-Trigonal nanocluster. The CCDC number of the Au<sub>2</sub>Cu<sub>6</sub>-Trigonal nanocluster is 2347507.

|                                                                   |                                                                                                |
|-------------------------------------------------------------------|------------------------------------------------------------------------------------------------|
| Molecular formula                                                 | C <sub>96</sub> H <sub>120</sub> Au <sub>2</sub> Cu <sub>6</sub> P <sub>2</sub> S <sub>6</sub> |
| Crystal system                                                    | trigonal                                                                                       |
| Space group                                                       | <i>R</i> -3                                                                                    |
| <i>a</i> /Å                                                       | 21.0039(6)                                                                                     |
| <i>b</i> /Å                                                       | 21.0039(6)                                                                                     |
| <i>c</i> /Å                                                       | 18.0081(6)                                                                                     |
| $\alpha$ /°                                                       | 90                                                                                             |
| $\beta$ /°                                                        | 90                                                                                             |
| $\gamma$ /°                                                       | 120                                                                                            |
| Volume/Å <sup>3</sup>                                             | 6880.2(5)                                                                                      |
| Z                                                                 | 3                                                                                              |
| $\rho_{\text{calc}}$ /cm <sup>3</sup>                             | 1.668                                                                                          |
| $\mu$ /mm <sup>-1</sup>                                           | 9.284                                                                                          |
| F(000)                                                            | 3462.0                                                                                         |
| Radiation                                                         | CuK $\alpha$ ( $\lambda$ = 1.54186)                                                            |
| Index ranges                                                      | -24 $\leq$ <i>h</i> $\leq$ 16, -19 $\leq$ <i>k</i> $\leq$ 23, -20 $\leq$ <i>l</i> $\leq$ 13    |
| 2 $\theta$ range (°)                                              | 13.788 to 124.994                                                                              |
| Measured reflections and unique reflections                       | 4428 [ <i>R</i> <sub>int</sub> = 0.0287, <i>R</i> <sub>sigma</sub> = 0.0316]                   |
| Goodness-of-fit on <i>F</i> <sup>2</sup>                          | 1.154                                                                                          |
| Largest diff. peak/hole / e Å <sup>-3</sup>                       | 1.34/-2.04                                                                                     |
| Final <i>R</i> indexes [ <i>I</i> $\geq$ 2 $\sigma$ ( <i>I</i> )] | <i>R</i> <sub>1</sub> = 0.0386, <i>wR</i> <sub>2</sub> = 0.1064                                |
| Final <i>R</i> indexes [all data]                                 | <i>R</i> <sub>1</sub> = 0.0419, <i>wR</i> <sub>2</sub> = 0.1260                                |
